# Supplementary material for: Elucidating a Complicated Enantioselective Metabolic Profile: A Study From Rats to Humans Using Optically Pure Doxazosin
Source: Frontiers journal article supplement (doi:10.3389/fphar.2022.834897), 2022-03-10
Supplement: Image_1.pdf [file Image_1.pdf]

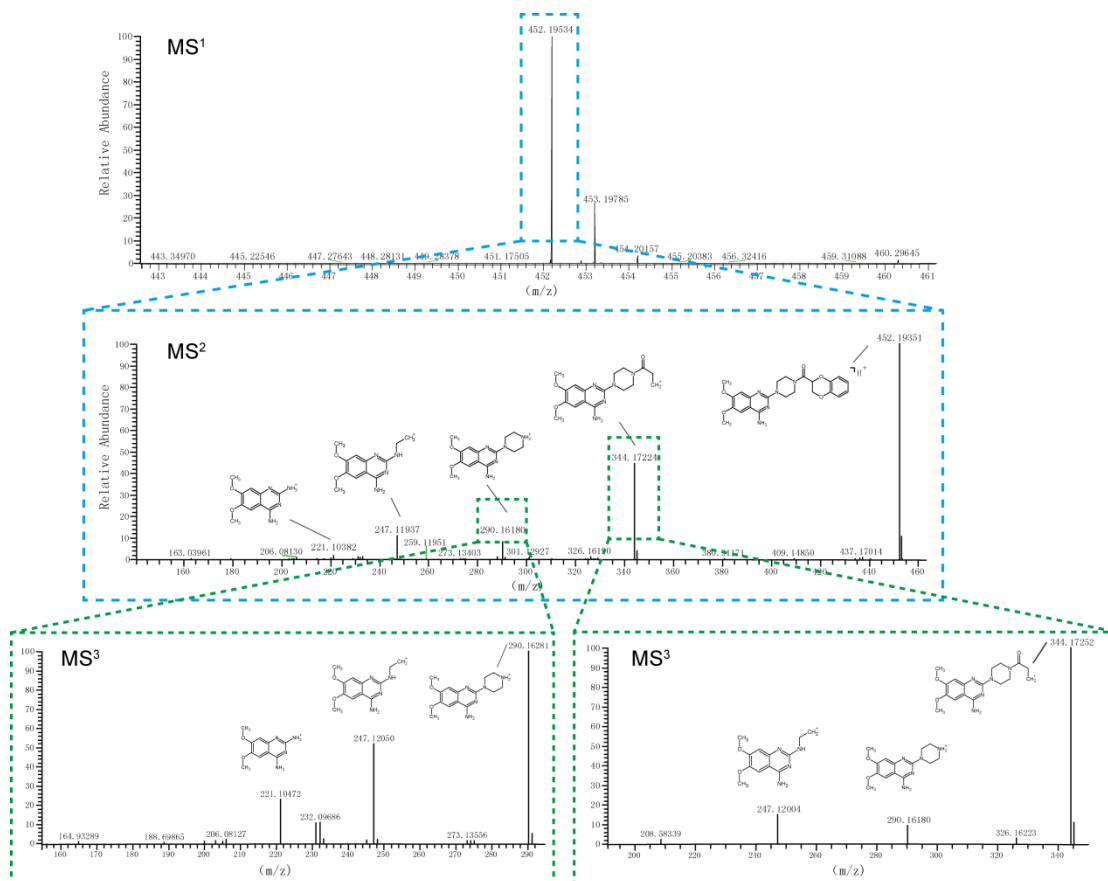

**Supplementary Figure S1** Illustrations of the fragmentation patterns of DOX in ESI-HCD-MS
