# Supplementary material for: Elucidating a Complicated Enantioselective Metabolic Profile: A Study From Rats to Humans Using Optically Pure Doxazosin
Source: Frontiers journal article supplement (doi:10.3389/fphar.2022.834897), 2022-03-10
Supplement: Image_3.pdf [file Image_3.pdf]

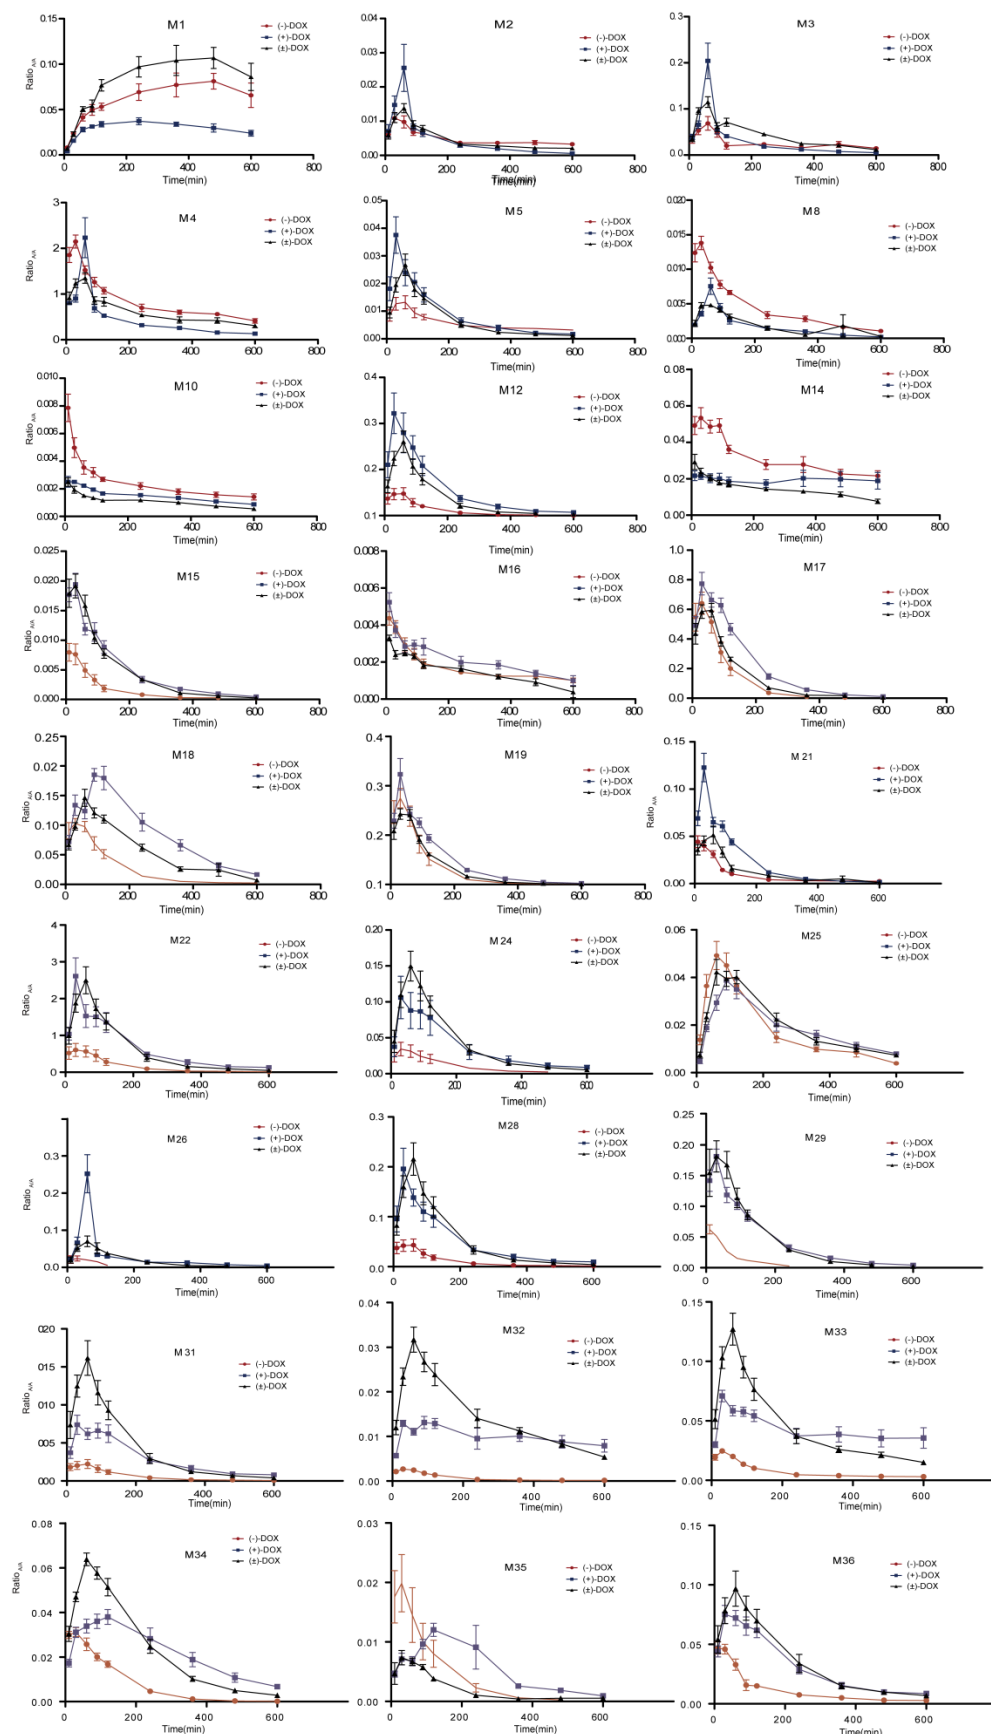

**Supplementary Figure S3** The mean plasma concentration-time curves for the metabolites of DOX obtained from six rats after intravenous injection of (-)-DOX, (+)-DOX or (±)-DOX, respectively.
