# Supplementary material for: Elucidating a Complicated Enantioselective Metabolic Profile: A Study From Rats to Humans Using Optically Pure Doxazosin
Source: Frontiers journal article supplement (doi:10.3389/fphar.2022.834897), 2022-03-10
Supplement: Image_5.pdf [file Image_5.pdf]

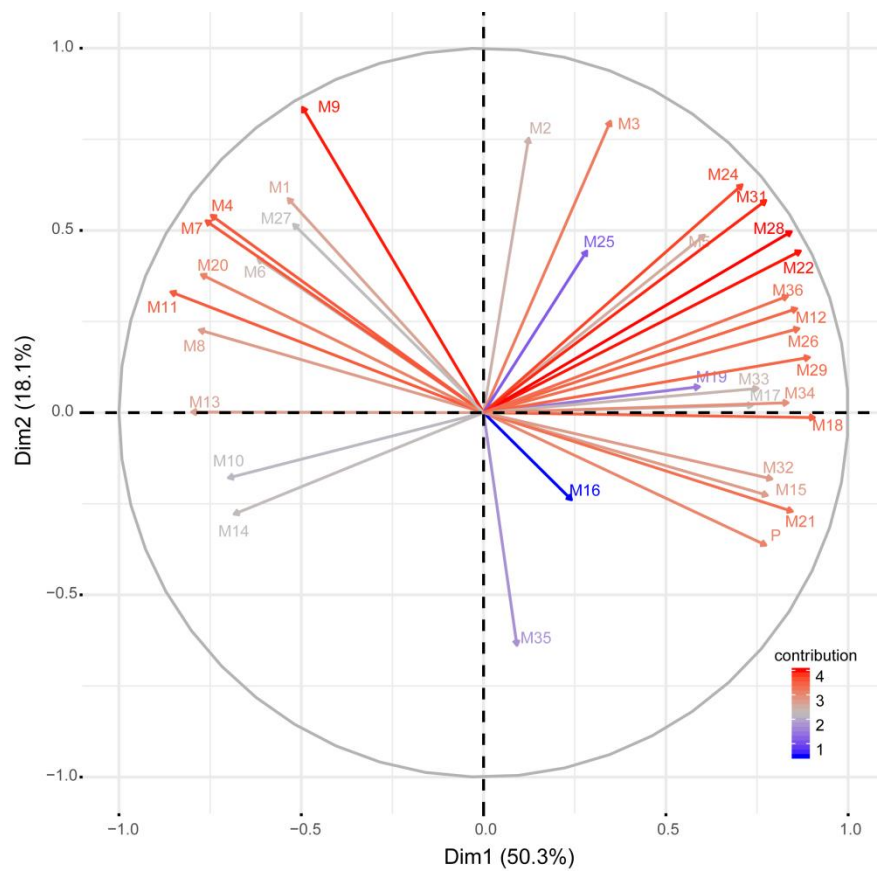

**Supplementary Figure S5** PCA loading plot indicating M22, M28 and M31 were the main contributors to the significant separation of metabolism between (-)-DOX and (+)-DOX
