# Supplementary material for: Elucidating a Complicated Enantioselective Metabolic Profile: A Study From Rats to Humans Using Optically Pure Doxazosin
Source: Frontiers journal article supplement (doi:10.3389/fphar.2022.834897), 2022-03-10
Supplement: Image_6.pdf [file Image_6.pdf]

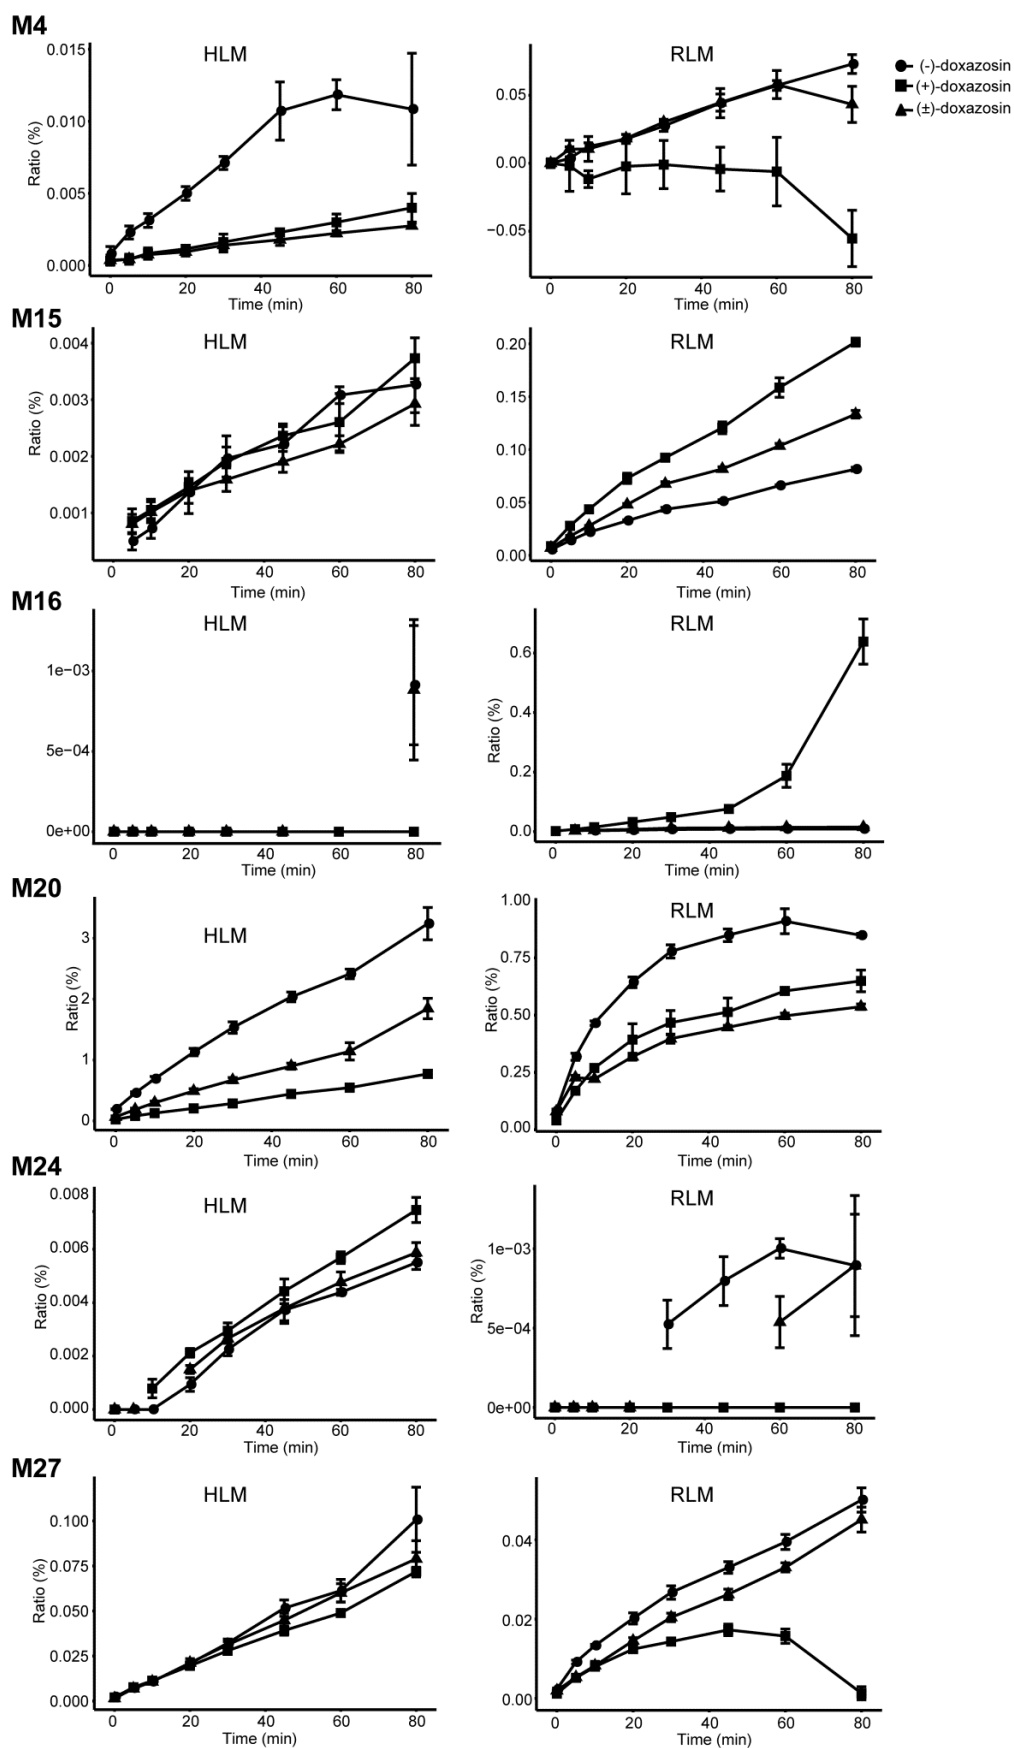

**Supplementary Figure S6** Chiral metabolic characteristics of M14~M16, M20, M24 and M27 in RLMs and in HLMs
